# Supplementary material for: Water-gas-shift reaction on reduced gold-substituted Ce1−xO2(111) surfaces: the role of Au charge
Source: Royal Society of Chemistry journal article supplement (doi:10.1039/c6cp07185f), 2016-12-20
Supplement: c6cp07185f1.pdf [file c6cp07185f1.pdf]

*Electronic Supplementary Information for*

**Water-Gas-Shift Reaction on Reduced Gold-Substituted  $\text{Ce}_{1-x}\text{O}_2(111)$  Surfaces: the Role of Au Charges**

Ming-Wen Chang and Wen-Shyan Sheu\*

Department of Chemistry, Fu-Jen Catholic University, Xinzhuang, New Taipei City  
24205, Taiwan, R. O. C.

\*Corresponding author. Tel.: +886 2 29053724; Fax: +886 2 29023209.

E-mail: chem1013@mails.fju.edu.tw (W.-S. Sheu).

**Table S1.** Comparison between the results obtained by the PW91 and HSE06 exchange-correlation functionals for the reaction of  $\text{H}_2\text{O}^{\text{V}} + \text{Au} \rightarrow \text{OH}^{\text{V}} + \text{H}^{\text{Au}}$  on various reduced  $\text{Au}@V_{\text{Ce}}$  surfaces with a  $p(3 \times 3)$  supercell.

| Oxygen vacancies                                        | $\Delta E_{\text{rxn}} / \text{eV}$ |                    |
|---------------------------------------------------------|-------------------------------------|--------------------|
|                                                         | PW91                                | <sup>a</sup> HSE06 |
| (V <sub>01</sub> )-                                     | 1.63                                | 1.50               |
| (V <sub>01</sub> , V <sub>02</sub> )-                   | 0.66                                | 0.69               |
| (V <sub>01</sub> , V <sub>02</sub> , V <sub>03</sub> )- | 0.53                                | 0.58               |
| (V <sub>01</sub> , V <sub>02</sub> , V <sub>04</sub> )- | -0.51                               | -0.62              |

<sup>a</sup>. Single point calculations were carried using a (1×1×1) k-point mesh on the geometries predicted by the PW91 functional.

**Table S2.** Comparison of various results obtained by (2×2×1) and (4×4×1) k-point meshes. The calculations were carried out by the PW91 functional on various reduced Au@V<sub>Ce</sub> surfaces with a p(3×3) supercell without the zero-point energy correction. q[Au]: the Bader charge on Au;  $E_f^V$ : the formation energy of oxygen vacancies;  $E_{ads}(H_2O)$ : the adsorption energy of a water molecule.

| Oxygen vacancies                                        | q[Au] / e |       | $E_f^V$ /eV |       | $E_{ads}(H_2O)$ /eV |       |
|---------------------------------------------------------|-----------|-------|-------------|-------|---------------------|-------|
|                                                         | 2×2×1     | 4×4×1 | 2×2×1       | 4×4×1 | 2×2×1               | 4×4×1 |
| (V <sub>O1</sub> )-                                     | 1.12      | 1.19  | -0.03       | -0.03 | -0.81               | -0.79 |
| (V <sub>O1</sub> , V <sub>O2</sub> )-                   | 0.40      | 0.41  | 1.21        | 1.21  | -0.94               | -0.94 |
| (V <sub>O1</sub> , V <sub>O2</sub> , V <sub>O3</sub> )- | 0.33      | 0.33  | 2.10        | 2.12  | -0.83               | -0.85 |
| (V <sub>O1</sub> , V <sub>O2</sub> , V <sub>O4</sub> )- | -0.59     | -0.59 | 3.64        | 3.64  | -0.93               | -0.93 |

**Table S3.** The imaginary Frequency (IMF) of the transition state for each step of the proposed WGS reaction mechanism on the Au@V<sub>Ce</sub> surfaces with various oxygen vacancy configurations

| Elementary Step                                                                         | Oxygen Vacancies                                        | IMF /cm <sup>-1</sup> |
|-----------------------------------------------------------------------------------------|---------------------------------------------------------|-----------------------|
| $\text{H}_2\text{O}^{\text{V}} \rightarrow \text{OH}^{\text{V}} + \text{H}^{\text{Au}}$ | (V <sub>O1</sub> )-                                     | 242 <i>i</i>          |
|                                                                                         | (V <sub>O1</sub> , V <sub>O2</sub> )-                   | 269 <i>i</i>          |
|                                                                                         | (V <sub>O1</sub> , V <sub>O2</sub> , V <sub>O3</sub> )- | 578 <i>i</i>          |
|                                                                                         | (V <sub>O1</sub> , V <sub>O2</sub> , V <sub>O4</sub> )- | 479 <i>i</i>          |
| $\text{CO}_{(\text{g})} + \text{OH}^{\text{V}} \rightarrow \text{cis-OCOH}^*$           | (V <sub>O1</sub> , V <sub>O2</sub> )-                   | 288 <i>i</i>          |
|                                                                                         | (V <sub>O1</sub> , V <sub>O2</sub> , V <sub>O3</sub> )- | 145 <i>i</i>          |
|                                                                                         | (V <sub>O1</sub> , V <sub>O2</sub> , V <sub>O4</sub> )- | 132 <i>i</i>          |
| $\text{cis-OCOH}^* + \text{H}^{\text{Au}} \rightarrow \text{CO}_2^* + \text{H}_2^*$     | (V <sub>O1</sub> , V <sub>O2</sub> )-                   | 693 <i>i</i>          |
|                                                                                         | (V <sub>O1</sub> , V <sub>O2</sub> , V <sub>O3</sub> )- | 753 <i>i</i>          |
|                                                                                         | (V <sub>O1</sub> , V <sub>O2</sub> , V <sub>O4</sub> )- | 425 <i>i</i>          |

## CO oxidation (oxygen vacancy creation)

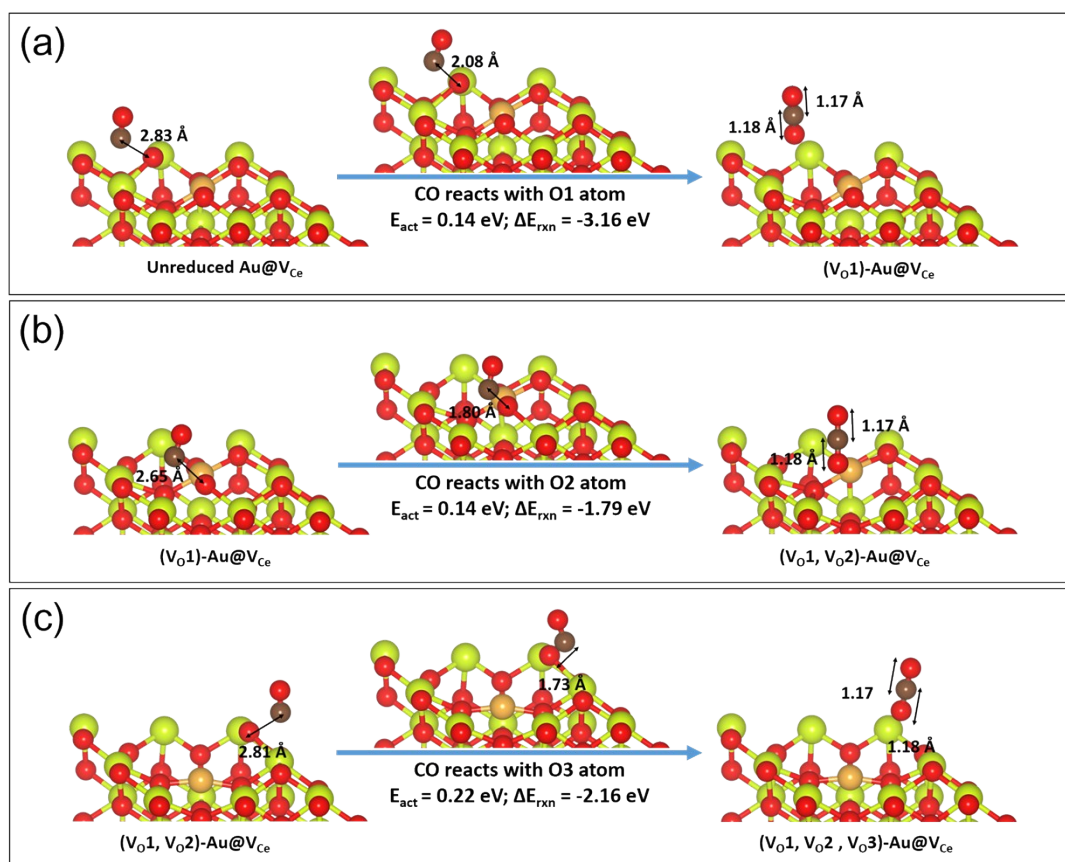

Figure S1. Structures and energies without the zero-point energy correction for CO molecules reacting with surface oxygens on (a) the unreduced-, (b) the (V<sub>O1</sub>)- and (c) the (V<sub>O1</sub>, V<sub>O2</sub>)-Au@V<sub>Ce</sub> surfaces. Ce, O, Au, and C atoms are shown by green, red, orange and brown spheres, respectively. The (V<sub>O1</sub>, V<sub>O2</sub>, V<sub>O4</sub>)-Au@V<sub>Ce</sub> surface is created by migration of the O<sub>4</sub> oxygen atom of the (V<sub>O1</sub>, V<sub>O2</sub>, V<sub>O3</sub>)-Au@V<sub>Ce</sub> surface to the V<sub>O3</sub> vacancy with surface relaxation. The migration reaction is 1.54 eV.
